# Supplementary material for: MicroRNA-Driven Developmental Remodeling in the Brain Distinguishes Humans from Other Primates
Source: PLoS Biol. 2011 Dec 6;9(12):e1001214. doi: 10.1371/journal.pbio.1001214 (PMC3232219; doi:10.1371/journal.pbio.1001214)

**A****miR-320b : cell line 1**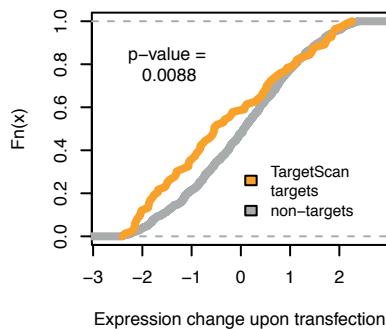**miR-320b : cell line 2**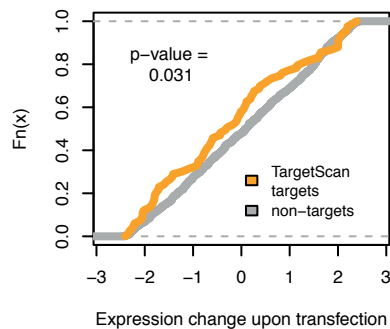**miR-454 : cell line 1**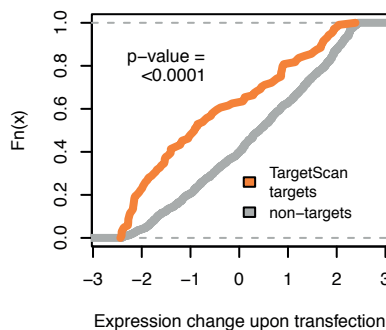**miR-454 : cell line 2**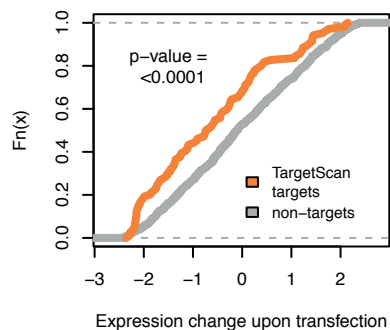**miR-92a : cell line 1**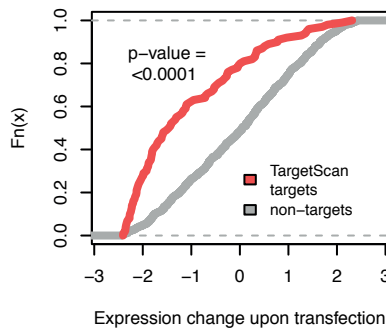**miR-92a : cell line 2**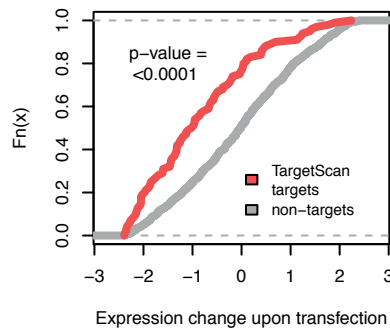**B****miR-320b**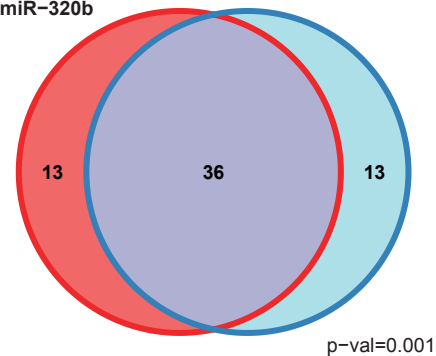**miR-454**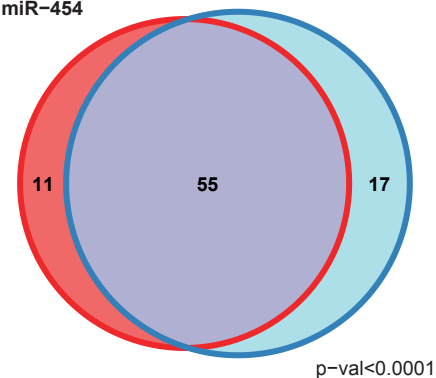**miR-92a**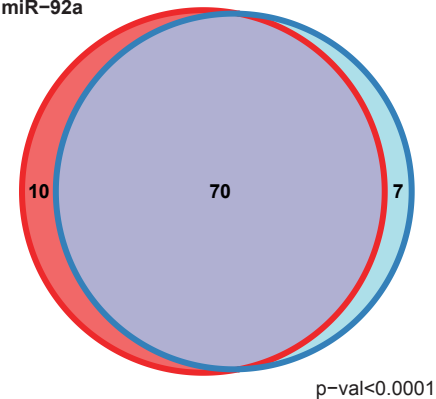

Supplement: Figure S8 — Gene expression shifts in miRNA-transfected cell lines. (A) The colored and grey lines show the cumulative density (y-axis) of the expression change magnitude upon transfection (x-axis), for target genes predicted by TargetScan among PFC type III genes, and all other type III genes, respectively. The x-axis is calculated as the expression level difference between miRNA-transfected and negative control-transfected neuroblastoma cell lines, per gene (Materials and Methods). The p values were calculated by one-sided Wilcoxon tests. Columns on the right and left show results for SK-N-SH and SH-SY5Y, respectively. In comparison, Figure 4B shows the mean expression change across the two cell lines. (B) Overlap between PFC type III genes showing down-regulation upon transfection in the two cell lines. The p values are based on one-sided hypergeometric tests and use genes showing up-regulation as background. (PDF) [file pbio.1001214.s008.pdf]
