# Supplementary material for: MicroRNA-Driven Developmental Remodeling in the Brain Distinguishes Humans from Other Primates
Source: PubMed Central journal article supplement (PMC3232219; doi:10.1371/journal.pbio.1001214), 2011-12-06

**A**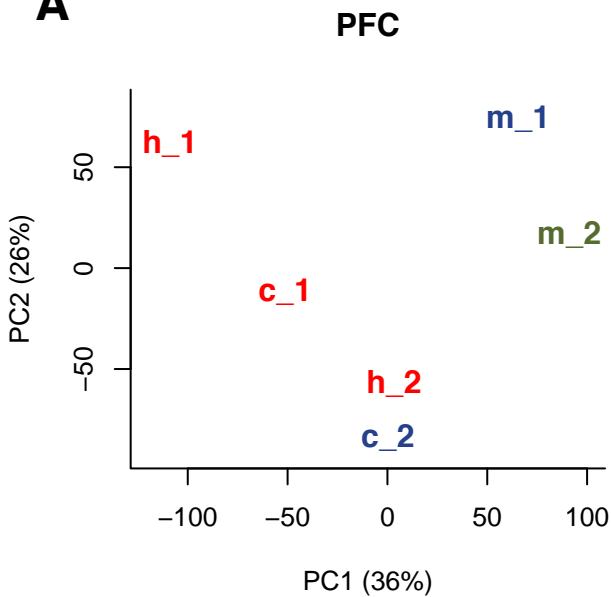**CBC**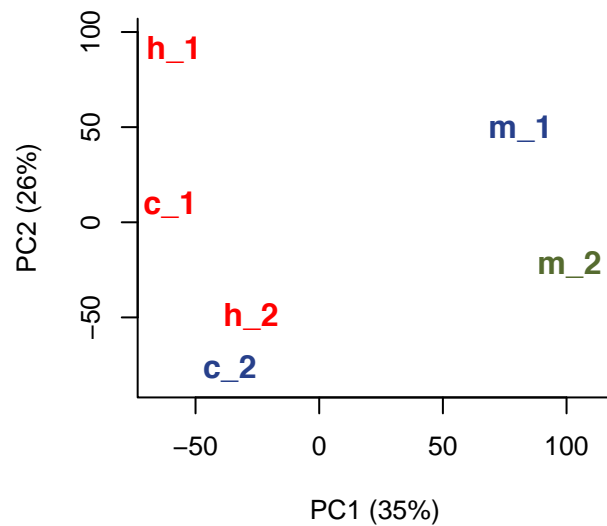**B**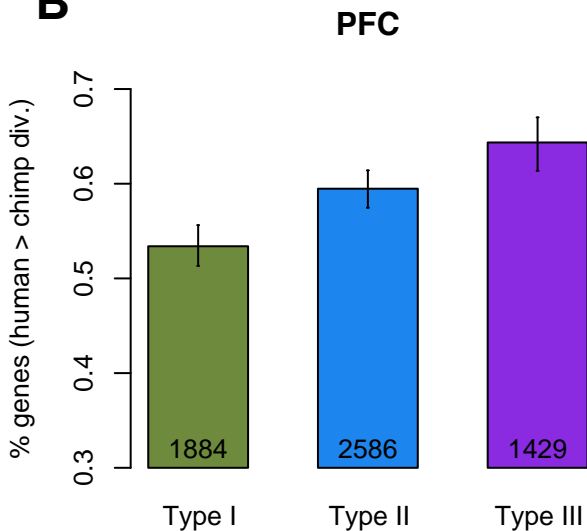**CBC**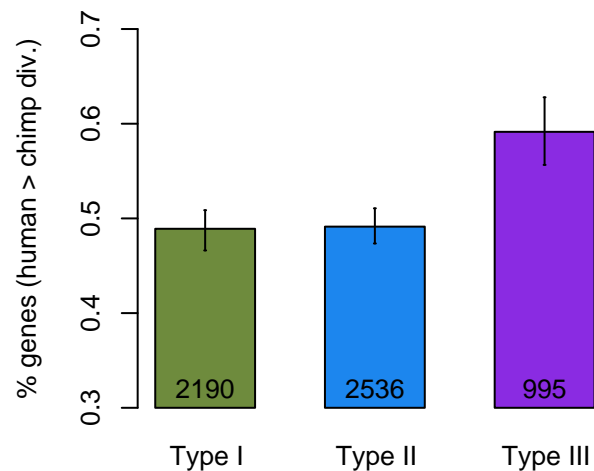

Supplement: pbio.1001214.s004.pdf [file pbio.1001214.s004.pdf]
