# Supplementary material for: MicroRNA-Driven Developmental Remodeling in the Brain Distinguishes Humans from Other Primates
Source: PubMed Central journal article supplement (PMC3232219; doi:10.1371/journal.pbio.1001214), 2011-12-06
Supplement: pbio.1001214.s006.pdf [file pbio.1001214.s006.pdf]

**Type I human**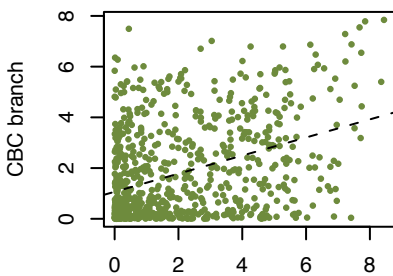

PFC branch  
 $\rho=0.37$   $p<0.0001$

**Type I chimp.**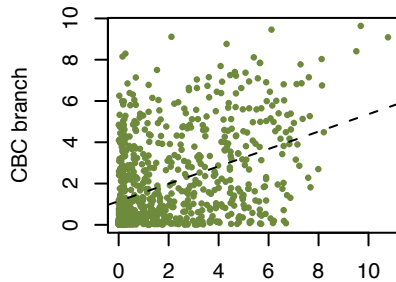

PFC branch  
 $\rho=0.38$   $p<0.0001$

**Type I macaque**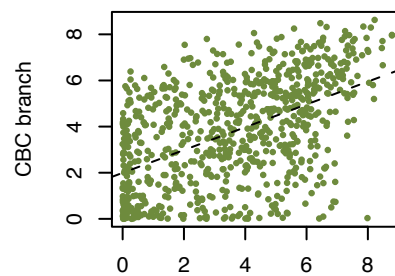

PFC branch  
 $\rho=0.51$   $p<0.0001$

**Type II human**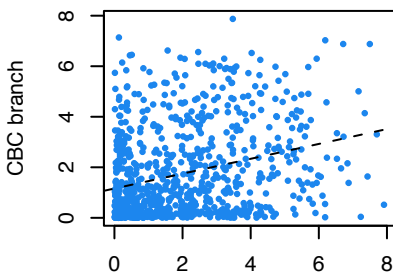

PFC branch  
 $\rho=0.28$   $p<0.0001$

**Type II chimp.**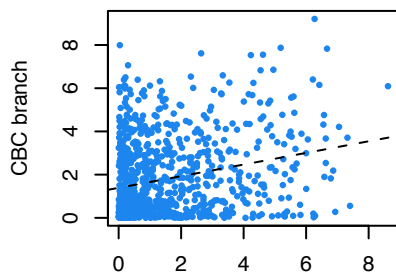

PFC branch  
 $\rho=0.23$   $p<0.0001$

**Type II macaque**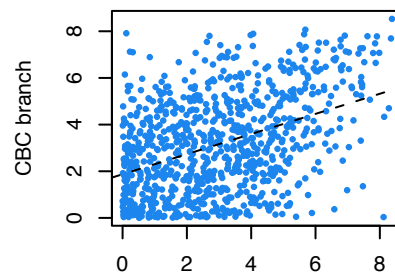

PFC branch  
 $\rho=0.38$   $p<0.0001$

**Type III human**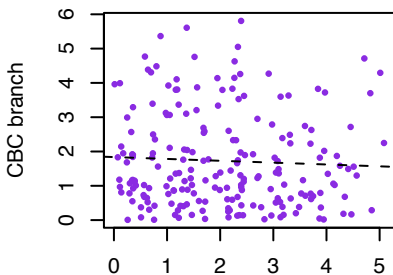

PFC branch  
 $\rho=-0.07$   $p=0.35$

**Type III chimp.**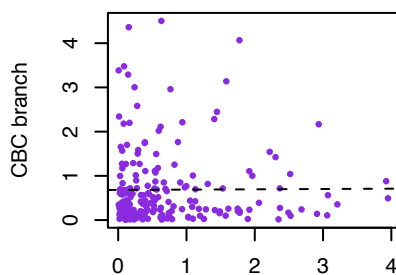

PFC branch  
 $\rho=0.03$   $p=0.71$

**Type III macaque**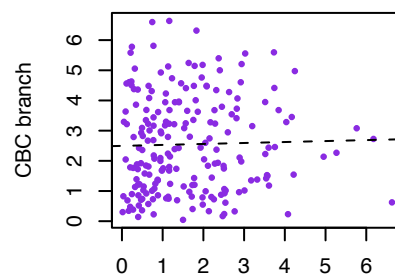

PFC branch  
 $\rho=0.06$   $p=0.38$
