# Supplementary material for: MicroRNA-Driven Developmental Remodeling in the Brain Distinguishes Humans from Other Primates
Source: PLoS Biol. 2011 Dec 6;9(12):e1001214. doi: 10.1371/journal.pbio.1001214 (PMC3232219; doi:10.1371/journal.pbio.1001214)
Supplement: Table S6 — Excess of predicted regulator-target correlations. Correlations between regulator versus predicted target pairs' expression profiles were compared to correlations between regulator versus non-target pairs (genes that are predicted to be targeted by other regulators), using the hypergeometric test (HT). We tested excess of negative and positive correlations for miRNA-target and TF-target pairs, respectively. We used two correlation cutoffs, and also two types of correlation: (1) is based on raw expression profiles and reflects both age and species effects, while (2) is based on expression differences among species (Text S1). (XLS) [file pbio.1001214.s015.xls]

## Sheet: Sheet1
				miRNA		TF
Correlation cutoff	Region	Divergence type	Correlation
			type	odd's ratio	HT p-value	odd's ratio	HT p-value
0.75	PFC	I	1	0.89	0.992	0.99	0.62
			2	0.74	1	1.03	0.194
	CBC	I	1	0.85	1	1.07	0.0292
			2	0.81	1	1.03	0.123
	PFC	II	1	1.31	3.47e-24	1.12	2.75e-05
			2	0.98	0.816	1.07	0.00744
	CBC	II	1	1.27	3.48e-19	1.04	0.0742
			2	0.93	0.998	1.08	0.000434
	PFC	III	1	1.18	5.79e-05	1.03	0.232
			2	1.11	0.00128	1.03	0.164
	CBC	III	1	1.13	0.00923	1.2	0.000414
			2	0.91	0.984	1.15	0.000239
0.9	PFC	I	1	0.68	1	1.1	0.152
			2	0.62	1	0.99	0.6
	CBC	I	1	0.74	0.998	1.15	0.0326
			2	0.7	1	1.14	0.0016
	PFC	II	1	1.5	5.99e-14	1.18	0.00425
			2	0.86	0.997	0.97	0.74
	CBC	II	1	1.31	4.15e-07	1.21	0.000814
			2	0.89	0.989	1.16	0.000181
	PFC	III	1	1.47	2.49e-05	1.17	0.0774
			2	1.06	0.226	1.06	0.19
	CBC	III	1	1.24	0.039	1.37	0.00732
			2	0.94	0.761	1.32	0.000209
